# Supplementary material for: Prognostic Implications of Chronic Heart Failure and Utility of NT-proBNP Levels in Heart Failure Patients with SARS-CoV-2 Infection
Source: PubMed Central journal article supplement (PMC7829899; doi:10.3390/jcm10020323), 2021-01-17
Supplement: jcm-10-00323-s001.pdf [file jcm-10-00323-s001.pdf]

**Table S1.** Baseline characteristics between patients with and without CHF in the whole cohort before matching.

|                             | <b>Total (n = 872)</b> | <b>CHF (n = 43)</b> | <b>Non-CHF (n = 829)</b> | <b>p-Value</b> |
|-----------------------------|------------------------|---------------------|--------------------------|----------------|
| Women                       | 386 (44.3)             | 22 (51.2)           | 364 (43.9)               | 0.35           |
| Age, years                  | 62.0 ( $\pm$ 18.0)     | 80.3 ( $\pm$ 12.1)  | 61.0 ( $\pm$ 17.9)       | 0.001          |
| Influenza vaccination       | 115 (13.2)             | 10 (23.3)           | 105 (12.7)               | 0.016          |
| Smoking                     | 208 (23.9)             | 9 (20.9)            | 199 (24)                 | 0.540          |
| Diabetes                    | 173 (19.8)             | 21 (48.8)           | 152 (18.3)               | 0.001          |
| Hypertension                | 383 (43.9)             | 38 (88.4)           | 345 (41.6)               | 0.001          |
| Dyslipemia                  | 281 (32.2)             | 27 (62.8)           | 254 (30.6)               | 0.001          |
| Obesity                     | 158 (18.1)             | 14 (32.6)           | 144 (17.4)               | 0.006          |
| Ischemic cardiac disease    | 60 (6.9)               | 10 (23.3)           | 50 (6)                   | 0.001          |
| AF or flutter               | 70 (8)                 | 22 (51.2)           | 48 (5.8)                 | 0.001          |
| Valvular heart disease      | 29 (3.3)               | 14 (32.6)           | 15 (1.8)                 | 0.001          |
| ACEI or ARB II              | 253 (29)               | 23 (53.3)           | 230 (27.7)               | 0.001          |
| COPD                        | 66 (7.6)               | 8 (18.6)            | 58 (7)                   | 0.012          |
| Previous Cancer             | 111 (12.7)             | 10 (23.3)           | 101 (12.2)               | 0.034          |
| CKD                         | 75 (8.6)               | 18 (41.9)           | 57 (6.9)                 | 0.001          |
| Peripheral vascular disease | 34 (3.9)               | 7 (16.3)            | 27 (3.3)                 | 0.001          |
| Stroke                      | 51 (5.8)               | 9 (20.9)            | 42 (5.1)                 | 0.001          |
| Asthma                      | 72 (8.3)               | 9 (20.9)            | 63 (7.6)                 | 0.005          |

Results are expressed as mean and (standard deviation), or number and (percentage). CHF: Chronic heart failure. ACEI: Angiotensin-converting-enzyme inhibitors, ARB II: Angiotensin II receptor blockers. COPD: chronic obstruction pulmonary disease. CKD: chronic kidney disease. AF: atrial fibrillation.
